1 **Rice lectin protein *Osr40c1* imparts drought tolerance by modulating *OsSAM2*, *OsSAP8***  
2 **and chromatin-associated proteins**

3 **Salman Sahid<sup>1,2</sup>, Chandan Roy<sup>1</sup>, Soumitra Paul<sup>1\*</sup>, Riddhi Datta<sup>2\*</sup>**

4 Email addresses:

5 Salman Sahid: [salmansahid1991@gmail.com](mailto:salmansahid1991@gmail.com), Chandan Roy: [suchandan.roy35@gmail.com](mailto:suchandan.roy35@gmail.com),

6 Soumitra Paul: [psoumitra@ymail.com](mailto:psoumitra@ymail.com), Riddhi Datta: [riddhi.bot@gmail.com](mailto:riddhi.bot@gmail.com)

7

8 \*Authors for correspondence:

9 Email: [psoumitra@ymail.com](mailto:psoumitra@ymail.com), [riddhi.bot@gmail.com](mailto:riddhi.bot@gmail.com); Telephone No: +919748605305,  
10 +919433084074; Fax No: +9133 2461 4849

11

12 Date of submission: 19.04.2020

13 Number of figures: 10; colour in on-line: 10

14 Word count: 5159

15 Total Supplementary Data: 14, Supplementary Figures: 13, Supplementary Tables: 01

16 Running title: ***Osr40c1* regulates drought tolerance in plants**

17

18 **Highlights:**

19 A rice lectin protein, *Osr40c1*, plays a crucial role in imparting drought stress tolerance in  
20 plants by modulating *OsSAM2* as well as the transcriptional regulators *OsSAP8*, *OsMNB1B*  
21 and *OsH4*.

22

23 **Abstract**

24 Lectin proteins play an important role in biotic and abiotic stress responses in plants.  
25 Although the rice lectin protein, *Osr40c1*, has been reported to be regulated by drought stress,  
26 the mechanism of its drought tolerance activity has not been studied so far. In this study, it  
27 has been depicted that expression of *Osr40c1* gene correlates with the drought tolerance  
28 potential of various rice cultivars. Transgenic rice plants overexpressing *Osr40c1* were  
29 significantly more tolerant to drought stress over the wild-type plants. Furthermore, ectopic  
30 expression of the *Osr40c1* gene in tobacco yielded a similar result. Interestingly, the protein  
31 displayed a nucleo-cytoplasmic localization and was found to interact with a number of  
32 drought-responsive proteins like *OsSAM2*, *OsSAP8*, *OsMNB1B*, and *OsH4*. Fascinatingly,  
33 silencing of each of these protein partners led to drought susceptibility in the otherwise  
34 tolerant *Osr40c1* expressing transgenic tobacco lines indicating that these partners were  
35 crucial for the *Osr40c1*-mediated drought tolerance *in planta*. Together, the present  
36 investigation delineated the novel role of *Osr40c1* protein in imparting drought tolerance by  
37 regulating the chromatin proteins, *OsMNB1B* and *OsH4*, which presumably enables *OsSAP8*  
38 to induce downstream gene expression. In addition, its interaction with *OsSAM2* might  
39 induce polyamine biosynthesis thus further improving drought tolerance in plants.

40 **Keywords**

41 Drought, lectin, *Osr40c1*, *OsSAP8*, *OsSAM2*, *OsMNB1B*, *OsH4*

42

## 43 **Introduction**

44 Rice is a staple food crop in most of the countries of Southeast Asia (Cassman *et al.*, 2003;  
45 Seck *et al.*, 2012). Generally, rice is cultivated in irrigated land and requires a higher amount  
46 of water compared to other crops (Mohanty *et al.*, 2013). Rice cultivation is hampered when  
47 the plants are exposed to a period of water deficiency due to an insufficient water supply or  
48 uncertainty of rainfall. In addition, plants are always exposed to a plethora of environmental  
49 challenges. Among them, drought stress has serious impacts on several physiological  
50 functions of plants. It inhibits growth and hampers seed development (Atkinson and Urwin,  
51 2012; You *et al.*, 2014). Therefore, the production of large biomass or high grain yield under  
52 water deficit or drought stress conditions has always been a major challenge. During drought,  
53 plants regulate several metabolic pathways involved with enzyme activity, alteration in  
54 different metabolite levels, and accumulation of compatible solutes to withstand the  
55 condition. However, the first impression of drought stress in plants is found from their  
56 morphological changes.

57 Drought tolerance is a complex physiological phenomenon that is not controlled by a single  
58 protein but involves the interaction of different signaling pathways (Datta *et al.* 2020). Plants  
59 have carbohydrate-binding lectin protein families that play an important role in plant defense  
60 and abiotic stress response including drought stress (Li *et al.*, 2014). In plants, the lectin  
61 family proteins can be classified into seven subfamilies (Peumans *et al.*, 2001). However,  
62 recently 12 plant lectin families have been recognized (Fouqueart *et al.*, 2008). Out of these  
63 families, R40 family of lectin protein contains the carbohydrate-binding ricin-like domain  
64 and shows osmotic stress responsiveness. In rice, five functional *Os*R40 proteins, r40c1,  
65 r40c2, r40g2, r40g3 and putative r40c1 have been reported (Jiang *et al.*, 2012). Fascinatingly,  
66 the R40 family of proteins has been reported to be up-regulated by abscisic acid (ABA)  
67 treatment and to play a salinity responsive role in rice (Moons *et al.*, 1995; Moons *et al.*,  
68 1997). Subsequently, it has been observed that the *Os*R40 family members exhibit osmotic  
69 stress-responsive function and are up-regulated during drought and salt treatment in plants  
70 (Riccardi *et al.*, 2004; Jiang *et al.*, 2012). In addition, it has also been demonstrated that a  
71 putative r40c1 protein (LOC\_Os03g21040) is up-accumulated in the roots of DREB2A-  
72 overexpressing rice plants under drought stress (Paul *et al.*, 2015). However, the functional  
73 mechanism of the *Osr*40c1 protein in regulating drought stress has not yet been studied.  
74 Therefore, the present study aims to unravel the molecular mechanism of this putative  
75 *Osr*40c1 protein in regulating drought stress response *in planta*.

76 In this work, we have reported that the expression of the *Osr40c1* gene is directly correlated  
77 with the drought tolerance potential of different rice cultivars and its overexpression  
78 significantly enhances drought tolerance in rice. In tobacco, the ectopic expression of the  
79 *Osr40c1* has also been found to impart drought tolerance. Moreover, it has been identified  
80 that the protein interacts with several drought-responsive protein partners like *OsSAP8*,  
81 *OsMNB1B*, *OsSAM2*, and *OsH4*. The silencing of these interacting protein partners has been  
82 found to induce susceptibility to drought stress thus demonstrating that the partners are  
83 indispensable for the *Osr40c1*-mediated drought stress tolerance *in planta*.

## 84 **Materials and methods**

### 85 **Plant material and stress treatment**

86 The eight *indica* rice cultivars, namely IR36, Ranjit, Khitish, IR64, IR72, Swarna sub1,  
87 Jaldi13, and MTU1010 were selected and seeds were procured from Chinsurah Rice  
88 Research Station, West Bengal, India. Plants were grown in the net-house under optimum  
89 condition. Plants were subjected to drought stress at vegetative stage (60 days old) with  
90 complete withdrawal of water for 7 days till the moisture level was maintained upto 45 % to  
91 50 % (Paul et al., 2015). After 7 days of drought exposure, plants were re-watered for 24 hrs.  
92 In addition, rice cultivars were germinated and grown on filter papers wetted with water for  
93 10 days under optimum photoperiod at 37 °C. The seedlings were treated with 20% PEG  
94 (6000) solution for 7 days for osmotic stress treatment.

95 Tobacco (*Nicotiana tabacum L. cv. Xanthi*) seeds were germinated and grown in standard  
96 Murashige and Skoog (MS) medium under 16 h light/ 8 h dark photoperiod as standardized  
97 before (Murashige and Skoog, 1962; Ghanta *et al.*, 2013). For drought stress, 60 days old  
98 soil-grown plants were subjected to drought stress by withdrawal of watering for 5 days until  
99 soil moisture content reached 45 %.

### 100 **Morphological Analysis**

101 Following the 7 days of drought stress, plant height, number of tillers, number of leaves,  
102 percentage of rolled and brown leaves, root length, dry weight of roots and shoots were  
103 considered under control, drought and re-watered conditions. Shoots and roots were dried at  
104 50 °C for 3 days to measure the dry weight.

### 105 **Biochemical analyses**



106 Proline content was estimated from the roots and shoots of rice plants collected from control,  
107 drought, and re-watered condition following Woodrow *et al.* (2016). Briefly, the roots and  
108 shoots were homogenized in 80% ethanol and mixed with 1% ninhydrin solution. The optical  
109 density was recorded by spectrophotometer (Hitachi) at 595 nanometer. The shoots and roots  
110 were homogenized in 0.05 % toluene and glycine betaine was measured according to Grieve  
111 and Grattan (1983). The total soluble sugar content was estimated following Dubois,1956  
112 with slight modifications. The samples were homogenized, boiled for 30 minutes and  
113 centrifuged (Hitachi) at 5000 rpm for 5 minutes. The supernatant was mixed with 9% phenol  
114 and 98% sulfuric acid and optical density has been measured through spectrophotometer  
115 (Hitachi) at 485 nanometer. The ascorbic acid and GSH content of roots and shoots from  
116 similar set of plants were also analyzed (Gillespie and Ainsworth 2007; Chen et al., 2011).

#### 117 **RNA Extraction and quantitative RT PCR**

118 Total RNA was extracted from root samples using the Trizol method. Complementary DNA  
119 (cDNA) was synthesised using iscript cDNA synthesis Kit following the manufacture's  
120 protocol (Bio-rad). The quantitative PCR (qPCR) analysis was performed in CFX 96 Real  
121 time PCR (Bio-rad) using gene specific primers (Table S1) and iTaq Universal SYBR Green  
122 Supermix (Bio-rad). The actin gene (*OsAct1*) was considered as reference gene while  
123 *OsDehydrin* gene has been selected as drought-responsive marker gene.

#### 124 **Generation of *Osr40c1* overexpressing transgenic rice plants and stress assay**

125 Total RNA was extracted from rice roots and cDNA was prepared using cDNA synthesis kit  
126 (Bio-rad). The full length gene was amplified from cDNA with gene specific primer (Fig S1)  
127 to obtain 1047 bp fragment of *Osr40c1* (Genebank Accession no: AC126222.2). The  
128 amplified fragment was cloned into pGEMT-Easy vector system (Promega) and then sub-  
129 cloned into the *EcoRI* and *BamHI* restriction enzyme (RE) sites of *pEGAD* vector under the  
130 control of CaMV35s promoter. The recombinant construct (*35S::Osr40c1-eGFP*) was  
131 introduced into *Agrobacterium* strain *GV3101* for transformation of *indica* rice cultivar  
132 khitish (IET4095) following Datta et al. (2000). The *Agrobacterium* strain containing the  
133 empty *pEGAD* vector (*35S::eGFP*) was also used for transformation of rice plants to generate  
134 vector control (VC) lines. The putative transgenic lines along with wild-type (WT) were  
135 grown in greenhouse with optimum photoperiodic conditions (16h light and 8h dark). The  
136 transgenic lines were screened by genomic DNA PCR using *Bar* gene specific primer. The  
137 positive transgenic plants were maintained upto T<sub>2</sub> generation. Different morphological

138 parameters, metabolite contents and expression of *Osr40c1* were analyzed from transgenic,  
139 VC and WT plants (grown under control and drought condition) as described above.

#### 140 **Subcellular Localization of *Osr40c1* Protein**

141 *Agrobacterium*-mediated infiltration of onion epidermal cell and subcellular localization of  
142 proteins was performed according to Xu et al. (2014). The *Agrobacterium* strain GV3101  
143 harbouring the recombinant construct (*35S::Osr40c1-eGFP*) was used to infiltrate the onion  
144 epidermal cells. The infiltrated onion cells were incubated in dark at 28 °C. The epidermal  
145 cells were also stained with the nuclear stain, DAPI and visualized under confocal laser  
146 scanning microscope.

#### 147 **Generation of ectopic line of *Osr40c1* in tobacco**

148 The recombinant construct (*35S::Osr40c1-eGFP*) was used for *Agrobacterium*-mediated  
149 transformation of tobacco following leaf disc method (Ghanta *et al.*, 2013). The putative  
150 transformed lines were confirmed through genomic DNA PCR with *Bar* gene specific  
151 primers. The positive transgenic lines were grown up to T<sub>2</sub> generation. The morphological  
152 and biochemical parameters as well as *Osr40c1* expression were analyzed in response to  
153 stress treatment as described above.

#### 154 **Yeast Two Hybrid Assay**

155 Yeast two-hybrid analysis was performed using the Matchmaker Gold Yeast Two-Hybrid  
156 System (Clontech) following manufacturer's protocol. The *Osr40c1* gene was cloned into  
157 *EcoRI* and *BamHI* RE sites of *pGBKT7* vector to generate recombinant *BD-Osr40c1* bait  
158 construct. Yeast transformation was performed according to the instructions of clontech  
159 manual. The cDNA library was prepared from rice roots collected from the plants exposed  
160 under drought stress. The cDNA library was ligated to *pGADT7-Rec* vector to prepare  
161 recombinant AD construct using Make Your Own "Mate and Plate" Library system  
162 (Clontech). The yeast strain Y2H gold was co-transformed with bait and prey recombinant  
163 construct and colonies were screened against DDO (*SD/-Leu/-Trp*) and QDO/X/A (*SD/-Ade/-*  
164 *His/-Leu/-Trp* with aureobsidin A and X- $\alpha$ -gal). Selected blue colonies were analyzed by  
165 sequencing according to the manufacturer's instruction to identify the interacting protein  
166 partner(s). The *AD-T-antigen* and *BD-p53* interaction was considered as positive control.

#### 167 **Bimolecular Fluorescence Complementation (BiFC) assay**

168 The *Osr40c1* gene was cloned between the *StuI* and *BamHI* RE sites of *pVYCE (R)* vector to  
169 obtain *35S::Osr40c1-cVenus* construct. Simultaneously, the partners like *OsSAP8*,  
170 *OsMNB1B*, *OsSAM2*, and *OsH4* were cloned at the same RE sites of *pVYNE (R)* vector to  
171 generate *35S::OsSAP8-nVenus*, *35S::OsMNB1B-nVenus*, *35S::OsSAM2-nVenus*, and  
172 *35S::OsH4-nVenus* constructs respectively (Waadt et al. 2008). The recombinant constructs  
173 were transformed into *Agrobacterium* strain GV3101 and used for infiltration of onion  
174 epidermal cells in pairwise combinations according to Yang *et al.* (2014). The samples were  
175 analyzed to detect the expression of Venus protein under laser scanning confocal microscope  
176 (Olympus FV1000-IX81) using excitation wavelength of 514 nm. The *35S::Osr40c1-cVenus*  
177 construct with empty *35S::nVenus* vector was considered as negative control.

### 178 **Homology modelling of *Osr40c1*, *OsSAM2*, *OsSAP8*, *OsMNB1B* and *OsH4* proteins and** 179 **molecular docking analysis**

180 The protein sequences for *Osr40c1*, *OsSAM2*, *OsSAP8*, *OsMNB1B*, and *OsH4* were  
181 retrieved from Uniprot and subjected to ROBETTA (Song et al., 2013) for prediction of 3D  
182 structures through homology modelling. The 3D structures were filtered or energy minimized  
183 by YASARA (Kreiger et al., 2009). Models were further validated by PROCHECK  
184 (Laskowski et al., 1996) using Ramachandran plot. According to Ramachandran plot, the  
185 residues of disordered region were refined using MOD Refiner and Sphinx servers (Fischer  
186 and Sali 2003; Dunbar et al., 2016) and further validated by PROCHECK. The molecular  
187 docking analysis for *Osr40c1* and each of the interacting proteins were carried out by ClusPro  
188 software (Vazda et al., 2017; Kozakov et al., 2017).

### 189 **Virus Induced Gene Silencing (VIGS) of transgenic tobacco plants**

190 Each fragment of *NtPDS*, *NtSAP8*, *NtSAM2*, *NtHMG1/2* genes were amplified from cDNA of  
191 tobacco using gene specific primers (supplementary table 1) and cloned into *pTRV2* vector  
192 between *EcoRI* and *BamHI* RE sites. The *Agrobacterium*-mediated inoculation of tobacco  
193 was carried out following Atsumi et al. (2018). For leaf infiltration, each *Agrobacterium*  
194 culture harbouring *pTRV1* and recombinant *pTRV2* constructs were mixed into 1:1 ratio and  
195 infiltrated into the leaves of transgenic tobacco (*Osr40c1* ectopic line) using a needleless  
196 syringe. The plants were maintained at 25 °C for effective viral infection and spread. The  
197 *NtPDS* gene was used as an internal control of VIGS.

### 198 **Statistical analysis**

199 Three independent biological replicates and three technical replicates for each set were  
200 considered for all experiments where applicable and data were represented as mean  $\pm$   
201 standard error of mean (SEM). The differences in morphological parameters, metabolite  
202 contents and transcript abundances among genotypes and treatments were analyzed using  
203 GraphPad Prism version 8.0.0 software (GraphPad Software, San Diego, California USA)  
204 following two-way ANOVA and Sidak's multiple comparison tests. The statistical  
205 significance at  $p \leq 0.05$  was considered to identify the difference between the two sets of  
206 data.

## 207 **Results**

### 208 ***Osr40c1* expression is highly correlated with the degree of drought tolerance in rice**

209 To analyze the drought tolerance potential of different rice cultivars, we have exposed eight  
210 *indica* rice cultivars to 7 days of drought stress and arranged them according to their degree  
211 of drought tolerance (Fig. 1A). Different agronomic traits like plant height, number of tillers,  
212 number of leaves, percentage of rolled leaves, percentage of brown leaves, root and shoot dry  
213 weight have been considered for this study (Fig. S1). As expected, no alteration in the plant  
214 height, number of tillers and leaf numbers have been observed in any of the cultivars. Leaf  
215 rolling and browning are considered as important physiological phenomena that determine  
216 the degree of drought stress impact on plants (Clarke, 1986). The leaf rolling has been  
217 observed after 48 hours of drought exposure in most of the varieties except IR36 and IR72.  
218 The percentage of rolled and brown leaves has been found to be the highest in MTU1010 and  
219 Jaldi13 and lowest in IR36 and IR72 in response to drought stress. Plant growth was  
220 markedly reduced after drought stress exposure in most of the varieties. The shoot and root  
221 dry weight differences had been found to be least in IR36 and IR72 and most prominent in  
222 MTU1010 and Jaldi13 in response to drought stress. After 24 hours of re-watering, the most  
223 pronounced revival has been observed for IR36 and IR72 as evidenced by the decreased  
224 percentage of rolled leaves and brown leaves. Next, we have estimated different metabolite  
225 contents from these eight cultivars in response to drought and re-watering. Significant  
226 augmentation in the contents of proline, glycine betaine, soluble sugar, ascorbic acid, and  
227 GSH has been observed in the roots and shoots of most of the cultivars in response to drought  
228 stress (Fig. S2). On the basis of all these analyses, the IR36 and IR72 cultivars have appeared  
229 to be most tolerant to drought stress, Jaldi13 and MTU1010 to be most susceptible while the  
230 other cultivars as moderately susceptible to drought stress.

231 It has been observed that the *Osr40c1* expression is significantly higher in the root in  
232 comparison to the shoot under both control and drought conditions (Fig. S3). To determine its  
233 transcript abundance in the eight rice cultivars, we have performed qRT-PCR analysis for the  
234 *Osr40c1* gene as well as a marker gene, *OsDehydrin*, from the roots under control, drought  
235 and re-watered conditions (Fig. 1B). In response to drought stress, the highest induction in  
236 *Osr40c1* expression has been observed in case of IR36 (7.325 fold) and IR72 (4.505 fold)  
237 while the weakest induction has been noticed in case of MTU1010 (1.923 fold) and Jaldi13  
238 (1.681 fold). In all other varieties, the induction level was moderate. In response to re-  
239 watering, the transcript abundance reduced to 3.62 fold in IR36 and 1.74 fold in IR72  
240 suggesting their revival from stress. The expression of the marker gene, *OsDehydrin*, has also  
241 been found to be highest in the IR36 and IR72 as compared to the rest of the cultivars. These  
242 observations have interestingly demonstrated a positive correlation of *Osr40c1* expression  
243 with the degree of drought tolerance among the eight selected rice cultivars.

#### 244 ***Osr40c1* gene is also regulated under PEG-mediated osmotic stress**

245 To study if *Osr40c1* is regulated under osmotic stress as well, we have investigated the  
246 responses of the eight rice cultivars in response to 20% PEG (6000) exposure. The osmotic  
247 stress tolerance potential has been found to be highest in IR36 and IR72 and lowest in Jaldi13  
248 and MTU1010 which supported our earlier observation (Fig. 2A). We have also measured the  
249 compatible solute and other metabolite contents from the eight cultivars. The alteration of  
250 metabolite contents in response to PEG mediated stress has been found to be similar to that of  
251 the drought stress (data not shown). We have next, analyzed the expression of the *Osr40c1*  
252 gene under control, PEG, and revival conditions. As expected, the transcript abundance was  
253 maximum in the case of IR36 (2.404 fold) and IR72 (2.724 fold) and minimum in the case of  
254 Jaldi13 (1.574 fold) and MTU1010 (1.540 fold) in response to PEG exposure (Fig. 2B). The  
255 transcript abundance dropped considerably in the tolerant cultivars but not in the susceptible  
256 ones in response to revival.

#### 257 ***Osr40c1* protein displays a nucleo-cytoplasmic localization**

258 To determine the subcellular localization of the *Osr40c1* protein, we have used the  
259 *35S::Osr40c1-eGFP* construct for *Agrobacterium*-mediated infiltration of onion epidermal  
260 cells. It has been observed that *Osr40c1*-eGFP fusion protein is predominantly localized in  
261 the nucleus and the cytoplasm (Fig. 3). A *35S::eGFP* construct has been used as a positive

262 control. Onion cells, stained with DAPI confirmed the presence of the fusion protein in the  
263 nucleus.

#### 264 **Overexpression of *Osr40c1* significantly enhances drought tolerance in rice**

265 To biologically validate the drought-responsive role of *Osr40c1*, we have generated *Osr40c1*  
266 overexpressing transgenic rice lines by introducing the *35S::Osr40c1-eGFP* construct via  
267 *Agrobacterium*-mediated transformation. Out of 17 independent putative T<sub>0</sub> transformed  
268 plants, 13 were found to be positive (Fig. S4). Three best lines have been selected based on  
269 the expression level of *Osr40c1* and maintained up to T<sub>2</sub> generation. All the selected  
270 overexpression (OX) lines have been found to exhibit significantly improved drought stress  
271 tolerance over the wild-type (WT) and vector control (VC) plants (Fig. 4A). We have  
272 analyzed different agronomical parameters like plant height, tiller numbers, percentage of  
273 brown and rolled leaves, shoot and root dry weight of the OX lines and compared with the  
274 WT and VC plants. The OX lines displayed no morphological alteration as compared to the  
275 WT under control condition. However, under drought stress, the OX lines have been found to  
276 display a lower percentage of leaf rolling and brown leaves as compared to the VC and WT  
277 plants (Fig. S5). Furthermore, we have measured the proline, glycine betaine, soluble sugars,  
278 ascorbic acid, and GSH contents from the roots and shoots of the OX, VC, and WT plants.  
279 The metabolite accumulation has been found to increase in all the lines in response to drought  
280 stress (Fig. S6).

281 Next, the expression of *Osr40c1* has been analyzed under control, drought and re-watered  
282 conditions. The expression of the *Osr40c1* gene has been found to be increased by around 3  
283 fold in the OX lines as compared to the WT under control condition. Under drought stress as  
284 well, the transcript abundance has been found to be significantly higher in the OX lines over  
285 the VC and WT plants (Fig. 4B).

#### 286 **Ectopic expression of *Osr40c1* enhances drought tolerance in tobacco**

287 Further, to confirm the function of *Osr40c1* in a heterologous system, tobacco lines  
288 ectopically expressing the *Osr40c1* gene have been developed. Out of 21 putative  
289 transformed lines generated, 16 positive transformed lines have been obtained (Fig. S7).  
290 Three best lines with the highest *Osr40c1* expression have been selected for further analyses.  
291 The transgenic tobacco (OX) lines have displayed significant improvement in drought  
292 tolerance over the WT and VC lines when exposed under drought stress (Fig. 5A).  
293 Furthermore, a significant accumulation of *Osr40c1* transcript has been observed in the



294 transgenic lines while no expression could be detected in the WT and VC plants since *r40c1*  
295 is exclusively present in rice (Fig. 5B). These observations, together, have strongly suggested  
296 that *Osr40c1* plays a crucial role in imparting drought stress tolerance in plants.

### 297 ***Osr40c1* interacts with several drought-responsive protein partners**

298 To identify the interacting partners of *Osr40c1* protein, we have performed yeast two-hybrid  
299 analysis using *Osr40c1* protein as bait. The cDNA library prepared from rice roots under  
300 drought stress has been used as prey. After performing the yeast two-hybrid analysis and  
301 screening on DDO, QDO, and high stringency QDO/X/A plates, 16 blue colonies were  
302 selected. Sequence analysis identified 8 non-redundant protein partners for *Osr40c1* namely,  
303 *OsMNB1B* (LOC4342129), *OsSAP8* (LOC4341520), *OsSAM2* (LOC4326996), *OsH4*  
304 (LOC4347135), uncharacterized-I (LOC4337962), uncharacterized-II (LOC4338275),  
305 *OsPBL19* (LOC4342066), and *OsCyclinD* (LOC4331985) (Fig. 6A). The interaction of the  
306 p53 protein with T-antigen has been used as a positive control. Additionally, we have  
307 checked the expression levels of each of these partners along with *Osr40c1* from rice roots in  
308 response to drought stress. Fascinatingly, it has been observed that the expression of  
309 *Osr40c1*, *OsMNB1B*, *OsSAM2* and *OsH4* are significantly up-regulated under drought stress  
310 thus indicating their possible involvement in regulating drought response in plants (Fig. 6B).

311 To validate the interaction of these 4 selected protein partners, we have performed BiFC  
312 analysis in onion epidermal cells. A strong yellow fluorescent signal of Venus protein has  
313 been observed in the cytoplasm as well as the nucleus when *OsSAP8* interacted with *Osr40c1*  
314 protein. On the other hand, the interaction of *OsSAM2*, *OsMNB1B*, and *OsH4* with *Osr40c1*  
315 has predominantly been detected in the nucleus (Fig. 7). No fluorescent signal has been  
316 observed for the empty *35S::nVenus* vector and *35S::Osr40c1-cVenus* pair which served as  
317 the negative control.

318 *In-silico* analysis has been performed through homology modeling followed by molecular  
319 docking analysis to re-confirm the interaction of the protein partners with *Osr40c1*. The 3D  
320 structures for *Osr40c1*, *OsSAP8*, *OsH4*, *OsSAM2*, and *OsMNB1B* have been generated using  
321 Robetta server followed by structure refining, energy minimization and validation using  
322 PROCHECK server (Fig. S8). The percentage of amino acid residues that fall in the most  
323 favored regions of the Ramachandran plot has been found to be 88%, 84.9%, 94%, 88.7%  
324 and 94.2% respectively, while none of the residues have been found in the generously  
325 allowed or the disallowed regions (Fig. S9-S13). The best 3D structures for each protein have

326 been selected and used for molecular docking analysis which re-confirmed the interaction of  
327 *Osr40c1* with each of its interacting protein partners (Fig. 8).

### 328 **Silencing of the interacting protein partners leads to drought susceptibility in transgenic** 329 **tobacco plants**

330 To unravel the biological significance of the protein partners in *Osr40c1*-mediated drought  
331 response in plants, the orthologs of *OsSAP8*, *OsSAM2* and *OsMNB1B* have been silenced  
332 through VIGS in the transgenic tobacco lines ectopically expressing *Osr40c1*. The proteins  
333 *NtHMG1/2* (LOC107781188), *NtSAP8* (LOC107822754) and *NtSAM2* (LOC107770931),  
334 have been considered as orthologs to the rice proteins *OsMNB1B*, *OsSAP8*, and *OsSAM2*  
335 respectively. The silencing of *NtPDS* has been used as a positive control for VIGS system  
336 (Ratcliff et al., 2001; Turnage et al., 2002). After 7 days of drought treatment, the VIGS lines  
337 for *NtHMG1/2*, *NtSAP8* and *NtSAM2* have displayed prominent drought sensitivity in the  
338 otherwise tolerant transgenic lines (Fig. 9A,C,E,G). Severe wilting has been noticed in the  
339 case of all three silencing events under drought stress. Interestingly, plants of *NtSAP8* and  
340 *NtHMG1/2* silencing lines have been found to be more affected than WT under drought  
341 stress. The relative expressions of the silenced genes (*NtHMG1/2*, *NtSAP8* and *NtSAM2*)  
342 along with *Osr40c1* gene in all three lines have been analyzed. A reduction by 82.71%,  
343 87.739%, and 89.83% has been observed in case of *NtHMG1/2*, *NtSAP8* and *NtSAM2*  
344 transcript abundance respectively in the silenced plants. However, significant induction of  
345 *Osr40c1* has been observed in the silenced as well as the non-silenced lines under drought  
346 stress (Fig. 9B,D,F). Together, our analysis strongly indicates that interaction with these  
347 protein factors is crucial for the *Osr40c1*-mediated stress tolerance *in planta*.

### 348 **Discussion**

349 Lectins are a family of carbohydrate-binding proteins known to play vital roles in diverse  
350 physiological phenomena in plants. Among them, the R40 proteins are considered as a stress-  
351 responsive group of lectin proteins that serve predominant roles in regulating osmotic stress  
352 responses in different plant species (Moons *et al.*, 1997; Jiang *et al.*, 2012). Drought is a  
353 major threat for agriculture and hampers rice productivity. In plants, roots are the first to  
354 respond to water deficiency in soil and triggers downstream signalling pathways for its  
355 adaptation under drought stress. Excitingly, the *Osr40c1* is predominantly expressed in the  
356 roots under control as well as drought conditions. This observation also corroborates with the  
357 earlier report which identified the up-accumulation of *Osr40c1* protein in rice roots under



358 drought stress (Paul *et al.*, 2015). However, the mechanism of how this protein imparts  
359 drought stress tolerance in plants remains elusive so far.

360 In the present study, we have demonstrated that the expression of *Osr40c1* gene is highly  
361 correlated with the degree of drought tolerance in rice. We have studied 8 *indica* rice  
362 cultivars for their drought and osmotic stress tolerance potentials. Several morphological  
363 parameters have been analyzed under control, stress and re-watered conditions. Among them,  
364 the percentage of rolled and brown leaves, increase in root length and changes in the root and  
365 shoot biomass in response to stress has been considered to assess their drought tolerance  
366 potential. Out of the 8 varieties, the IR36 and IR72 considered as drought tolerant owing to  
367 their lower percentage of rolled and brown leaves, higher biomass, and longer root length in  
368 response to drought stress. The two varieties, Jaldi13 and MTU1010 have displayed highest  
369 degree of drought susceptibility. The accumulation patterns of different osmotically active  
370 metabolites have also been analyzed in these varieties. Proline and glycine betaine are  
371 considered as osmotically active compounds that maintains cellular integrity during osmotic  
372 stress responses in plants (Chen *et al.*, 2002). The involvement of GSH and ascorbate in  
373 regulating abiotic stress has also been widely reported (Noctor and Foyer, 1998; Datta et al.,  
374 2020). The highest accumulation of these compounds in IR36 and IR72 suggest their drought  
375 tolerant properties. However, in the case of all the 8 cultivars, the accumulation of these  
376 metabolites has increased in response to drought stress. The expression of the *Osr40c1* gene  
377 has been observed to increase under drought stress condition in all the cultivars. Interestingly,  
378 its transcript abundance has been the highest in the tolerant cultivars, IR36 and IR72 and the  
379 lowest in the susceptible cultivars, Jaldi13 and MTU1010 thus indicating a positive  
380 correlation with the drought tolerance potential in plants. Moreover, the transgenic rice lines  
381 overexpressing *Osr40c1* gene exhibited significantly improved drought tolerance over the  
382 WT and VC plants further establishing its role in drought response. A similar observation has  
383 been found in case of tobacco plants ectopically expressing the *Osr40c1* gene.

384 Once the crucial role of *Osr40c1* has been established in drought tolerance, we have aimed to  
385 unravel the mechanism of how it imparts this tolerance in plants. Since protein localization  
386 may have important influence on protein function, we have first analyzed the sub-cellular  
387 localization of this protein. Fascinatingly, the protein has been found to exhibit a nucleo-  
388 cytoplasmic localization. Next, several interesting protein partners have been identified to  
389 interact with the *Osr40c1* protein. In addition, two uncharacterized proteins have also been  
390 identified which needs to be explored in future. Out of the 8 identified partners, a

391 transcription factor, *OsSAP8*, and 2 chromatin-associated proteins, *OsMNB1B* and *OsH4*  
392 have been found to be drought-responsive. Silencing of each these partner proteins have  
393 resulted in pronounced drought susceptibility of the transgenic tobacco plants ectopically  
394 expressing *Osr40c1* gene. This observation confirms that these protein partners are crucial for  
395 the *Osr40c1*-mediated drought stress tolerance in plants.

396 *OsSAP8* is an osmotic stress-responsive transcription factor that comprises of two DNA-  
397 binding zinc finger domains – an N-terminal AN20 domain and a C-terminal AN1 domain.  
398 Previous studies have reported that several SAP proteins including *SAP8* are regulated by  
399 drought and salinity stress and they enhance drought tolerance in rice (Kanneganti and Gupta  
400 2007; Kothari *et al.*, 2016). It has also been reported that ABA triggers the accumulation of  
401 *OsSAP8* in plants. Therefore, it can be hypothesized that the *Osr40c1*, being an ABA  
402 responsive gene as well, can regulate *OsSAP8* via a common ABA signalling pathway.  
403 Moreover, it has been demonstrated that the A20 domain of SAP proteins can interact with  
404 itself while the AN1 domain can interact with the A20 domain (Kanneganti and Gupta 2007).  
405 In addition, the *OsSAP8* imparts drought stress tolerance in plants via interaction with other  
406 stress associated proteins to regulate the intricate signalling mechanism of drought tolerance  
407 (Giri *et al.* 2011). Therefore, it can be assumed that the *Osr40c1* interaction leads to a  
408 conformational change in the *OsSAP8* protein thus facilitating its binding to the *cis*-acting  
409 regulatory regions of drought responsive genes.

410 The *Osr40c1* protein has also been found to interact with a chromatin-associated protein  
411 *OsMNB1B*, which is known to participate in chromatin modification and transcriptional  
412 induction. The *OsMNB1B* protein belongs to the high mobility group (HMG) proteins and  
413 bears a high sequence homology with the HMGB1 protein. It has been widely demonstrated  
414 that the HMGB1 protein can compete with the histone H1 to bind to the linker nucleosomal  
415 region of DNA. This opens up the chromatin and makes the DNA accessible to transcription  
416 factors (Nightingale *et al.*, 1996; Catez *et al.*, 2004). Earlier, it has been reported that maize  
417 MNB1B can bind to a specific AAGG motif in DNA whereas rice HMG1B protein  
418 specifically interacts with the four way regions (4H) of DNA and DNA minicircle thus  
419 leading to bending of the DNA molecule (Yinagisawa and Izui 1993; Wu *et al.*, 2003).  
420 Besides, the HMG1 protein has been found to be interacting with the bZIP transcription  
421 factors and to enhance their binding to their target regulatory elements in DNA (Izawa *et al.*,  
422 1994). In addition, the HMGB1 proteins have been reported to function in an ABA-  
423 responsive pathway to impart abiotic stress tolerance (Christov *et al.*, 2007). Keeping in view

424 all these interesting findings, it can be attributed that the *OsMNB1B* protein helps in  
425 chromatin remodelling of drought responsive genes thus making them accessible to the  
426 *OsSAP8-Osr40c1* complex which ultimately leads to the induction of the downstream  
427 drought responsive genes. In addition, this entire pathway may be operated via an ABA-  
428 responsive pathway. The histone protein modification has been commonly associated with  
429 several osmotic stress responsive genes in various plant species (Kim *et al.*, 2015). This  
430 modification includes methylation and acetylation of different lysine and arginine residues of  
431 histone H3 and H4. Since *OsH4* has been identified as one of the interacting partners of  
432 *Osr40c1*, the probability of *Osr40c1*-mediated histone modification of different downstream  
433 drought-responsive genes cannot be ruled out.

434 SAM2 is an S-adenosine methyltransferase that is known to be up-regulated under drought  
435 stress and catalyze the synthesis of S-adenosyl-methionine (S-AdoMet). S-AdoMet is an  
436 important component of DNA, RNA, and protein methylation in plants (Meng *et al.*, 2018).  
437 On the other hand, SAM2 helps in polyamine biosynthesis which is essential for plants to  
438 cope with the adverse conditions of drought or salt stress (Ma *et al.*, 2017). The  
439 overexpression of sugar beet SAM2 also exhibited an enhanced drought tolerance in  
440 *Arabidopsis* (Ma *et al.* 2017). Together, it can be hypothesized that the *Osr40c1* protein may  
441 activate *OsSAM2* which leads to synthesis of more S-AdoMet. This in turn increases the  
442 polyamine biosynthesis ultimately leading to drought stress tolerance in plants.

443 In summary, it can be concluded that the rice lectin protein, *Osr40c1*, provides drought stress  
444 tolerance in rice by interacting with several exciting protein partners. It has been  
445 hypothesized that drought stress induces the expression of *Osr40c1* protein. This protein then  
446 interacts with the chromatin-associated proteins, *OsMNB1B* and *OsH4* presumably to induce  
447 chromatin remodelling. This enables the *OsSAP8* transcription factor to bind to its target  
448 DNA motif to induce the expression of downstream drought-responsive genes (Fig. 10).  
449 Since all these proteins have been reported to be ABA-responsive, the entire pathway may  
450 function as a complex in an ABA-dependent pathway. In addition, *Osr40c1* also interacts  
451 with *OsSAM2* protein thus inducing drought tolerance via polyamine biosynthesis pathway.  
452 Together, the present investigation demonstrates the novel role of *Osr40c1* in imparting  
453 drought tolerance via regulation of crucial transcriptional regulators as well as SAM2 protein  
454 in plants.

455 **Supplementary data**

- 456 Fig. S1. Morphological analysis of 8 *indica* rice cultivars in response to drought stress
- 457 Fig. S2. Estimation of different metabolites from 8 *indica* rice cultivars in response to  
458 drought stress
- 459 Fig. S3. Expression of *Osr40c1* gene from root and shoot of rice plant in response to drought  
460 stress
- 461 Fig. S4. Screening of transgenic rice lines overexpressing *Osr40c1* gene
- 462 Fig. S5. Morphological analysis of transgenic rice plants in response to drought stress
- 463 Fig. S6. Estimation of different metabolites from transgenic rice plants in response to drought  
464 stress
- 465 Fig. S7. Screening of transgenic tobacco lines ectopically expressing *Osr40c1* gene
- 466 Fig. S8. Homology modelling of *Osr40c1*, *OsSAP8*, *OsSAM2*, *OsMNB1B*, and *OsH4*  
467 proteins
- 468 Fig. S9. Ramachandran plot analysis for *Osr40c1* protein
- 469 Fig. S10. Ramachandran plot analysis for *OsSAP8* protein
- 470 Fig. S11. Ramachandran plot analysis for *OsH4* protein
- 471 Fig. S12. Ramachandran plot analysis for *OsSAM2* protein
- 472 Fig. S13. Ramachandran plot analysis for *OsMNB1B* protein
- 473 Table S1. List of primers used

#### 474 **Acknowledgement**

475 This work has been supported by the Department of Science and Technology and  
476 Biotechnology, Government of West Bengal, India [BT(Budget)/RD-29/2016] and University  
477 Grant Commission, Government of India, India [UGC-CAS (Phase VII)]. We thank the  
478 central instrumentation facility of the Department of Botany, University of Calcutta and Dr.  
479 A. P. J. Abdul Kalam Government College as well as the confocal microscopic facility of  
480 DBT-IPLS, Department of Biochemistry, University of Calcutta. We thank Prof. Jörg Kudla  
481 (University of Munster, Germany) for providing the *pVYNE* and *pVYCE* vectors and Prof.  
482 Prabod Trivedi (CSIR-National Botanical Research Institute, India) for kindly sharing the  
483 *Agrobacterium tumefaciens* GV3101 strain. We are also thankful to Dr. Jyothilakshmi

484 Vaddassery, Staff Scientist IV, NIPGR, New Delhi for providing us the *pTRV1* and *pTRV2*  
485 vectors.

#### 486 **Author Contributions**

487 RD and SP conceived and designed the research plan; SH performed most of the  
488 experiments; CR performed rice transformation experiment, RD performed the *in silico*  
489 analyses; RD and SP analyzed the data; SH drafted the manuscript; RD and SP supervised  
490 and complemented the writing.

#### **References:**

**Atkinson NJ, Urwin PE.** 2012. The interaction of plant biotic and abiotic stresses: from genes to the field. *Journal of Experimental Botany* **63**, 3523–3543.

**Atsumi Go, Kagaya U, Tabayashi N, Matsumura T.** 2018. Analysis of the mechanisms regulating the expression of isoprenoid biosynthesis genes in hydroponically-grown *Nicotiana benthamiana* plants using virusinduced gene silencing. *Scientific Reports* **8**, 14804

**Cassman K, Dobermann A, Walters DT, Yang H.** 2003. Meeting Cereal Demand While Protecting Natural Resources and Improving Environmental Quality. *Annual Review of Environment and Resources* **28**, 315-358.

**Catez F, Yang H, Tracey KJ, Reeves R, Misteli T, Bustin M.** 2004. Network of dynamic interactions between histone H1 and high-mobility-group proteins in chromatin. *Molecular and Cellular Biology*. **24**, 4321-4328

**Chen JH, Jiang HW, Hsieh EJ, Chen CT, Hsieh HL, Lin TP.** 2011. Drought and salt stress tolerance of an *Arabidopsis* glutathione *s*-transferase U17 knockout mutant are attributed to the combined effect of glutathione and abscisic acid. *Plant Physiology* **158**, 340-351.

**Chen TH, Murata N.** 2002. Enhancement of tolerance of abiotic stress by metabolic engineering of betaines and other compatible solutes. *Current Opinion in Plant Biology* **5**, 250–257.

**Christov NK, Yoneyama S, Shimamoto Y, Imai R.** 2007. Differential expression of wheat genes during cold acclimation. *Tsitologia I genetika* **41**, 142–150

**Clarke JM.** 1986. Effect of leaf rolling on leaf water loss in *Trilicam* spp. Canadian Journal of Plant Science **66**, 885–891.

**Datta K, Koukolíková-Nicola Z, Baisakh N, Oliva N, Datta SK.** 2000. *Agrobacterium*-mediated engineering for sheath blight resistance of indica rice cultivars from different ecosystems. Theoretical and Applied Genetics **100**:832–839.

**Datta R; Sahid S., Paul S.** 2020. Networking by small molecule hormones during drought stress in plants ‘in’ Khan M.I.R; Singh A; Poor P. *Improving abiotic stress tolerance in plants*. CRC Press (in press)

**Dubois M.** 1956. Colorimetric method for determination of sugars and related substances. Analytical Chemistry **28**, 350–356.

**Dunbar J, Krawczyk K, Leem J, Marks C, Nowak J, Regep C, Georges G, Kelm S, Popovic B, Deane CM.** 2016. SabPred: a structure based antibody prediction server. Nucleic Acid Research. **44**, W474-W478.

**Fiser A, Sali A.** 2003. ModLoop: automated modeling of loops in protein structures. *Bioinformatics* **19**, 2500–2501

**Fouquaert E, Peumans WJ, Smith DF, Proost P, Savvides SN, Van Damme EJM.** 2008. The “old” *Euonymus europaeus* agglutinin represents a novel family of ubiquitous plant proteins. Plant Physiology **147**, 1316–1324.

**Gillespie KM, Ainsworth EA.** 2007. Measurement of reduced, oxidized and total ascorbate content in plants. Nature Protocol **2**, 871-874.

**Giri J, Vij S, Dansana PK, Tyagi AK.** 2011. Rice A20/AN1 zinc-finger containing stress-associated proteins (SAP1/11) and a receptor-like cytoplasmic kinase (OsRLCK253) interact via A20 zinc-finger and confer abiotic stress tolerance in transgenic *Arabidopsis* plants. New Phytologist **191**, 721-732.

**Grieve CM, Grattan SR.** 1983. Rapid assay for the determination of water soluble quaternary ammonium compounds. Plant and Soil **70**, 303-307.

**Ghanta S, Datta R, Bhattacharyya D, Sinha R, Kumar D, Hazra S, Mazumdar AB, Chattopadhyay S.** 2013. Multistep involvement of glutathione with salicylic acid and ethylene to combat environmental stress. Journal of Plant Physiology **171**, 940-950.

- Izawa T, Foster R, Nakajima M, Shimamoto K, Chua NH.** 1994. The rice bZIP transcriptional activator RITA-1 is highly expressed during seed development. *Plant Cell* **6**, 1277-1287.
- Jiang SS, Liang XN, Li X, Wang SL, Lv DW, Ma CY, Li XH, Ma WJ, Yan YM.** 2012. Wheat drought-responsive grain proteome analysis by linear and nonlinear 2-DE and MALDI-TOF mass spectrometry. *International Journal of Molecular Sciences* **13**, 16065-16083.
- Kanneganti V, Gupta AK.** 2007. Overexpression of OsiSAP8, a member of stress associated protein (SAP) gene family of rice confers tolerance to salt, drought and cold stress in transgenic tobacco and rice. *Plant Molecular Biology* **66**, 445–462.
- Kim JM, Sasaki T, Ueda M, Sako K, Seki M.** 2015. Chromatin changes in response to drought, salinity, heat, and cold stresses in plants. *Frontiers in Plant Science* **6**, 114.
- Kothari KS, Dansana PK, Giri J, Tyagi AK.** 2016. Rice Stress Associated Protein 1 (OsSAP1) Interacts with Aminotransferase (OsAMTR1) and Pathogenesis-Related 1a Protein (OsSCP) and Regulates Abiotic Stress Responses. *Frontier in Plant Science* **7**, 1057.
- Kozakov D, Hall DR, Xia B, Porter KA, Padhorney D, Yueh C, Beglov D, Vajda S.** 2017. The ClusPro web server for protein-protein docking. *Nature Protocols*. 12, 255-278.
- Krieger E, Joo K, Lee J, Lee J, Raman S, Thompson J, Tyka M, Baker D, Karplus K.** 2009. Improving physical realism, stereochemistry, and side-chain accuracy in homology modeling: Four approaches that performed well in CASP8. *Proteins* **77 Suppl 9**, 114-1122.
- Laskowski RA, Rullmannn JA, MacArthur MW, Kaptein R, Thornton JM.** 1996. AQUA and PROCHECK-NMR: programs for checking the quality of protein structures solved by NMR. *Journal of Biomolecular NMR* **8**, 477-486.
- Lichtenthaler HK.** 1987. Chlorophylls and carotenoids: pigments of photosynthetic biomembranes. *Methods Enzymology* **148**, 350–382
- Li D, Wang X, Yuan D, Zhang L, Jiang X, Tao Z, Li Y, Wang J, Li X, Yang Y.** 2014. Over-expression of *ArathEULS3* confers ABA sensitivity and drought tolerance in *Arabidopsis*. *Plant Cell Tissue and Organ culture* **117**, 431–442.



**Ma C, Wang Y, Gu D, Nan J, Chen S, Li H.** 2017. Overexpression of S-Adenosyl-L-Methionine Synthetase 2 from Sugar Beet M14 Increased Arabidopsis Tolerance to Salt and Oxidative Stress. *International Journal of Molecular Sciences* **18**, 847.

**Maximov NA, Krasnosselsky-maximov TA.** 1924. Wilting of plants in its connection with drought resistance. *Journal of Ecology* **12**, 95-110.

**Meng J, Wang L, Wang J, Zhao X, Cheng J, Yu W, Jin D, Li Q, Gong Z.** 2018. Methionine adenosyltransferase4 Mediates DNA and Histone Methylation. *Plant Physiology* **177**, 652-670.

**Mohanty M, Nanda SS, Barik AK.** 2013. Effect of integrated nutrient management on growth, yield, nutrient uptake and economics of wet season rice (*Oryza sativa*) in Odisha. *Indian Journal of Agricultural Sciences* **83(6)**, 599-604.

**Moons A, Bauw G, Prinsen E, Van Montagu M, Van Der Straeten D.** 1995. Molecular and physiological responses to abscisic acid and salts in roots of salt-sensitive and salt-tolerant Indica rice varieties. *Plant Physiology* **107**, 177-186.

**Moons A, Gielen J, Vandekerckhove J, Van Der Straeten D, Gheysen G, Van Montagu M.** 1997. An abscisic-acid-and salt-stress-responsive rice cDNA from a novel plant gene family. *Planta* **202**, 443-454.

**Murashige T, Skoog F.** 1962. A revised medium for rapid growth and bio assays with tobacco tissue cultures. *Physiologia. Plantarum* **15**, 473-497.

**Nightingale K, Dimitrov S, Reeves R, Wolffe AP.** 1996. Evidence for a shared structural role for HMG1 and linker histones B4 and H1 in organizing chromatin. *The EMBO Journal*. **15**, 548-561

**Noctor G, Foyer CH.** 1998. ASCORBATE AND GLUTATHIONE: Keeping active oxygen under control *Annual Review of Plant Physiology and Plant Molecular Biology* **49**, 249-279.

**Paul S, Gayen D, Datta SK, Datta K.** 2015. Dissecting root proteome of transgenic rice cultivars unravels metabolic alterations and accumulation of novel stress responsive proteins under drought stress. *Plant Science* **234**, 133-143.

**Peumans WJ, Van Damme EJ, Barre A, Rougé P.** 2001. Classification of plant lectins in families of structurally and evolutionary related proteins. *Advances in Experimental Medicine and Biology* **491**, 27-54.



- Ratcliff F, Martin-Hernandez AM, Baulcombe DC.** 2001. Tobacco rattle virus as a vector for analysis of gene function by silencing. *Plant Journal* **25**, 237–245.
- Riccardi F, Gazeau P, Jacquemot MP, Vincent D, Zivy M.** 2004. Deciphering genetic variations of proteome responses to water deficit in maize leaves. *Plant Physiology and Biochemistry* **42**, 1003–1011
- Seck PA, Diagne A, Mohanty S, Wopereis MCS.** 2012. Crops that feed the world 7: rice. *Food Security* **4**, 7–24.
- Song Y, DiMaio F, Wang RYR, Kim D, Miles C, Brunette TJ, Thompson J, Baker D.** 2013. High resolution comparative modeling with RosettaCM. *Structure* **21 (10)**, 1735-1742.
- Turnage MA, Muangsan N, Peele CG, Robertson D.** 2002. Gemini virus based vectors for gene silencing in Arabidopsis. *Plant Journal* **30**, 107–117.
- Waadt R, Schmidt LK, Lohse M, Hashimoto K, Bock R, Kudla J.** 2008. Multicolor bimolecular fluorescence complementation reveals simultaneous formation of alternative CBL/CIPK complexes in planta. *Plant Journal* **56(3)**, 505-516.
- Woodrow P, Ciarmiello LF, Annunziata MG, et al.** 2016. Durum wheat seedling responses to simultaneous high light and salinity involve a fine reconfiguration of amino acids and carbohydrate metabolism. *Physiologia Plantarum* **159**, 290-312.
- Wu Q, Zhang W, Pwee KH, Kumar PP.** 2003. Rice HMGB1 protein recognizes DNA structures and bends DNA efficiently. *Archives of Biochemistry and Biophysics* **411**, 105–111.
- Vajda S, Yueh C, Beglov D, Bohnuud T, Mottarella SE, Xia B, Hall DR, Kozakov D.** 2017. New additions to the ClusPro server motivated by CAPRI. *Proteins: Structure, Function, and Bioinformatics*. **85**, 435-444
- Xiang Y, Huang Y, Xiong Y.** 2007. Characterization of Stress-Responsive CIPK Genes in Rice for Stress Tolerance Improvement. *Plant Physiology* **144**, 1416–1428.
- Xu K, Huang X, Wu M, Wang Y, Chang Y, Liu K, Zhang J, Zhang Y, Zhang F, Yi L, Li T, Wang R, Tan G, Li C.** 2014. A Rapid, Highly Efficient and Economical Method of Agrobacterium-Mediated In planta Transient Transformation in Living Onion Epidermis. *PLoS One* **9(1)**, e83556.

**Yanagisawa S, Izui K.** 1993. Molecular cloning of two DNA-binding proteins of maize that are structurally different but interact with the same sequence motif. *Journal of Biological Chemistry* **268**, 16028– 16036.

**Yang ZP, Li HL, Guo D, Tang X, Peng SQ.** 2014. Identification and characterization of the 14-3-3 gene family in *Hevea brasiliensis*. *Plant Physiology and Biochemistry* **80**, 121-127.

**You J, Zong W, Hu H, Li X, Xiao J, Xiong L.** 2014. A stress responsive NAC1-regulated protein phosphatase gene rice protein phosphatase18 modulates drought and oxidative stress tolerance through abscisic acid-independent reactive oxygen species scavenging in rice. *Plant Physiology* **166**, 2100–2114.

## FIGURE LEGENDS

**Fig. 1. Drought stress analysis of eight indica rice cultivars, IR36, IR72, Ranjit, Swarna Sub-1, IR64, Khitish, Jaldi 13, MTU1010.** 60 days old plants were exposed under drought stress for 7 days and different morphological parameters were analyzed. (A) Morphological responses of eight indica rice cultivars after 7 days of drought stress and 24 hrs of re-watering. (B) qRT-PCR analysis to study the relative transcript abundance for *Osr40c1* protein and *Osdehydrin* genes. Results were represented as mean±SEM (n=3). Statistical difference between the cultivars under control and drought stress was denoted by small alphabet at p<0.05 (a), p<0.01 (b), p<0.001 (c) and p<0.0001 (d).

**Fig. 2. PEG mediated osmotic stress analysis of eight indica rice cultivars, IR36, IR72, Ranjit, Swarna Sub-1, IR64, Khitish, Jaldi 13, MTU1010.** Two weeks of old plants were treated with PEG solution for 7 days. (A) Morphological responses of eight indica rice cultivars after 7 days of PEG treatment and 24 hrs of revival. (B) Samples were also used for qRT-PCR analysis to study the relative transcript abundance for *Osr40c1* and *Osdehydrin* genes. Results were represented as mean±SEM (n=3). Statistical difference between the cultivars under control and drought stress was denoted by small alphabet at p<0.05 (a), p<0.01 (b), p<0.001 (c) and p<0.0001 (d).

**Fig. 3. Localization of Osr40c1 protein in onion epidermal cells.** Onion epidermal cells was infiltrated with recombinant construct (osR40c1) and empty vector (control). Strong green fluorescence of GFP protein in case of recombinant construct indicates the nucleo cytoplasmic localization of r40c1 protein while in case of empty vector (pEGAD) very low green fluorescence is observed. Blue fluorescence of DAPI indicates nuclear localization.

**Fig.4. Analysis of transgenic rice plants overexpressing *Osr40c1* gene.** The WT, VC and three independent transgenic lines (OX1, OX2 and OX3) were subjected to drought stress for 7 days and (A) morphological responses was recorded. The relative transcript abundance of *Osr40c1* gene (E) was also analyzed. Results were represented as mean±SEM (n=3). Statistical difference between the lines under control and drought stress was denoted by small alphabet p<0.0001 (d).

**Fig.5. Analysis of transgenic tobacco plants.** The WT, VC and three independent transgenic lines (OX1, OX2 and OX3) were subjected to drought stress for 5 days and (A) morphological responses was recorded. The relative transcript abundance of *Osr40c1* gene (E) was also analyzed. Results were represented as mean±SEM (n=3). Statistical difference

between the lines under control and drought stress was denoted by small alphabet  $p < 0.0001$  (d).

**Fig.6. Identification of interacting protein partners of *Osr40c1* protein under drought stress.** (A) Yeast two-hybrid analysis identified the interaction of *Osr40c1* with eight different proteins like *OsSAP8*, *OsSAM2*, *OsMNB1B*, *OsPBL19*, *OsH4*, *OsCyclinD*, Uncharacterised I and Uncharacterised II proteins. The interaction of p53 protein with T-antigen was used as a positive control. (B) qRT-PCR analysis to study the relative transcript abundance of each interacting protein partners along with *Osr40c1* under drought stress. Results were represented as mean $\pm$ SEM (n=3). Statistical difference between the cultivars under control and drought stress was denoted by small alphabet at  $p < 0.05$  (a) and  $p < 0.0001$  (d).

**Fig.7. BiFC analysis of *Osr40c1* and interacting protein partners.** The interaction of *Osr40c1* protein with *OsSAP8* in the nucleus and cytoplasm and with *OsSAM2*, *OsMNB1B* and *OsH4* in the nucleus was found. Venus fluorescence, bright field, and merged images were represented for each set of constructs.

**Fig. 8. *In silico* analysis for *Osr40c1*-*OsSAP8*, *Osr40c1*-*OsSAM2*, *Osr40c1*-*OsMNB1B* and *Osr40c1*-*OsH4* interaction.** Protein structures for *Osr40c1*, *OsSAP8*, *OsSAM2*, *OsMNB1B*, and *OsH4* were generated through homology modelling. The structures were used for molecular docking analysis which confirms the interaction.

**Fig. 9. Analysis of tobacco ectopic lines after VIGS mediated silencing of interacting protein partners.** Morphological responses of *NtSAP8* silenced lines (A) *NtSAM2* silenced lines (C) and (E) *NtHMG1/2* silenced lines after 5 days of drought exposure. qRT-PCR analysis to study the relative transcript abundance of *NtSAP8* (B), *NtSAM2* (D) and *NtHMG1/2* (F) gene along with *Osr40c1* under drought stress. Results were represented as mean $\pm$ SEM (n=3). Statistical difference between the cultivars under control and drought stress was denoted by small alphabet at  $p < 0.0001$  (d).

**Fig. 10. Model for *Osr40c1*-mediated regulation of drought stress.** Drought stress triggers *Osr40c1* gene expression in cells. In the mean time, the expression of *OsSAM2*, *OsSAP8*, *OsMNB1B* and *OsH4* genes are also induced followed by higher accumulation. The *Osr40c1* then binds with the chromatin modification associated proteins like *OsSAP8*, *OsMNB1B* and *OsH4* to activate the transcription of downstream drought responsive genes presumably inducing the chromatin remodelling of drought responsive genes. On the other hand, *Osr40c1*

can interact with OsSAM2 to activate the protein that enhances the polyamine biosynthesis. Together, these results suggest both the transcriptional activation of downstream drought-responsive genes and polyamine accumulation which ultimately leads to drought stress tolerance in plants

**A**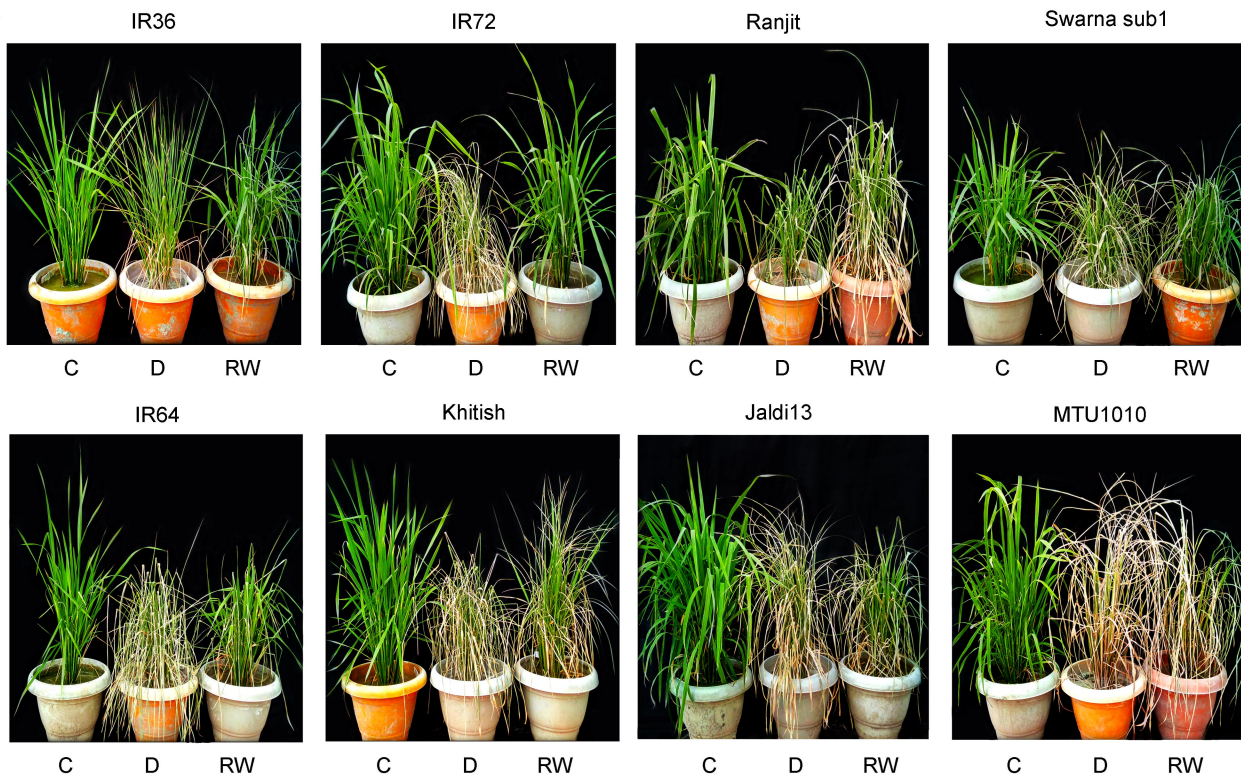**B**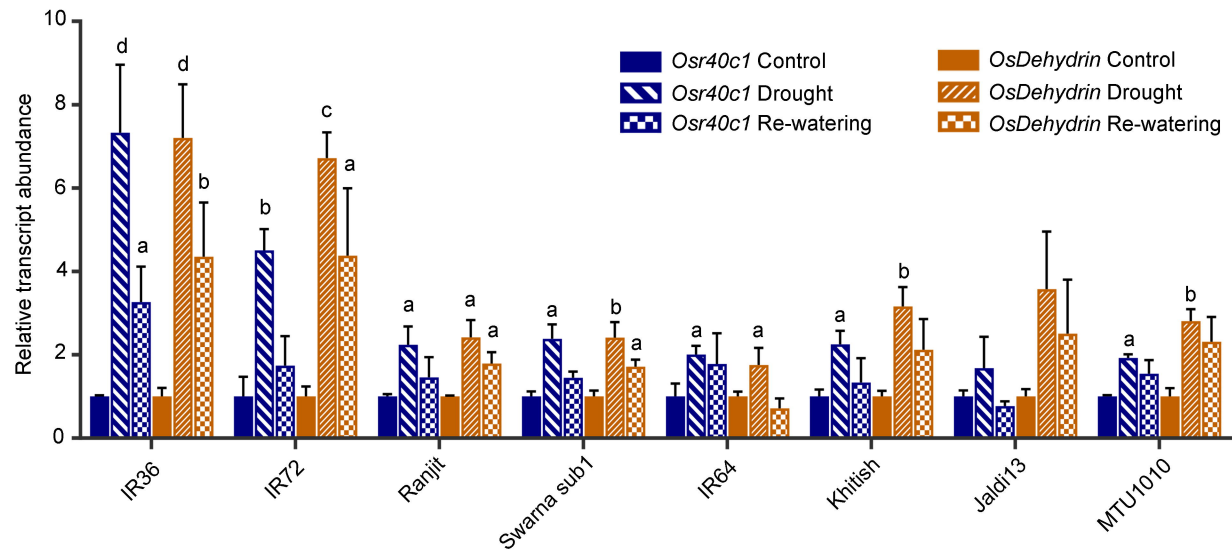



**a**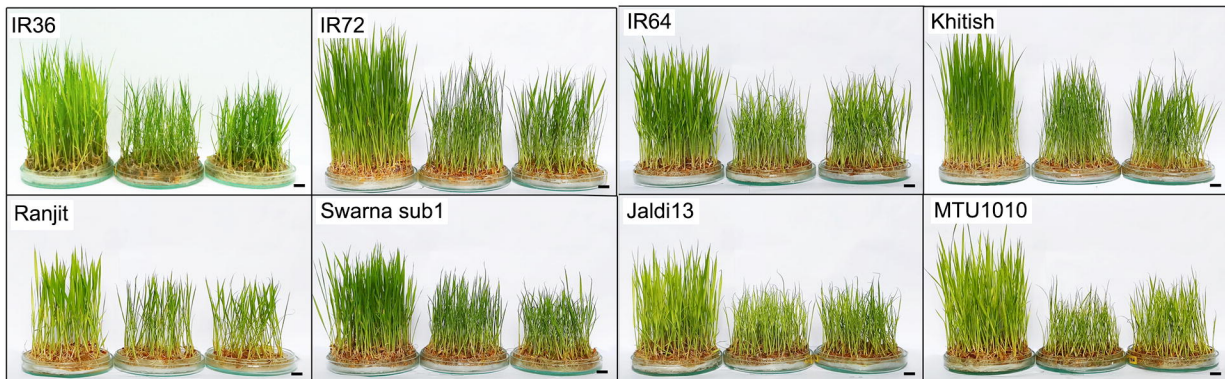**b**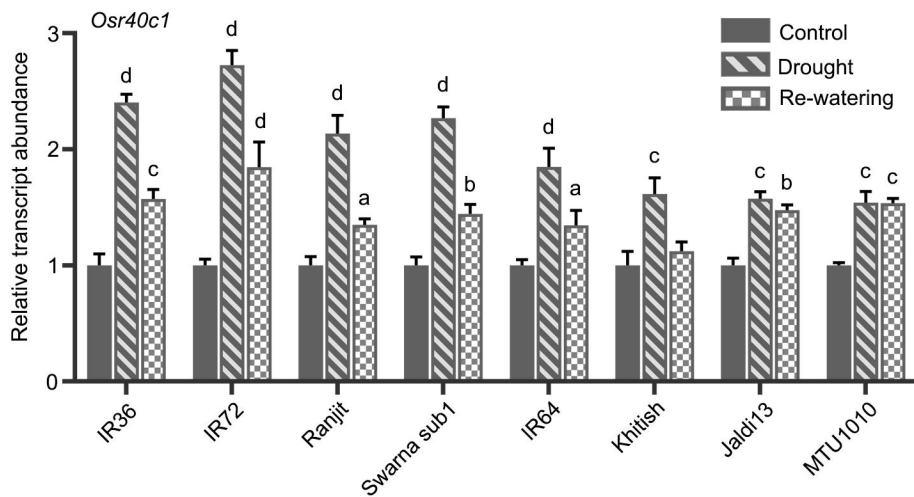

GFP

DAPI

Merged

*Osr40c1*

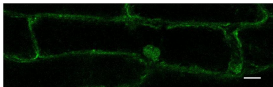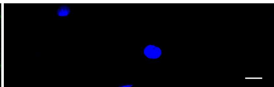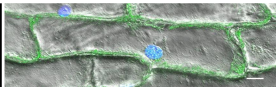

Control

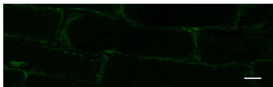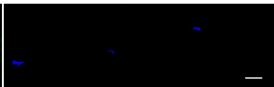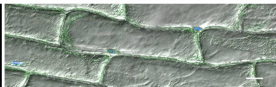

Scale: 50 um



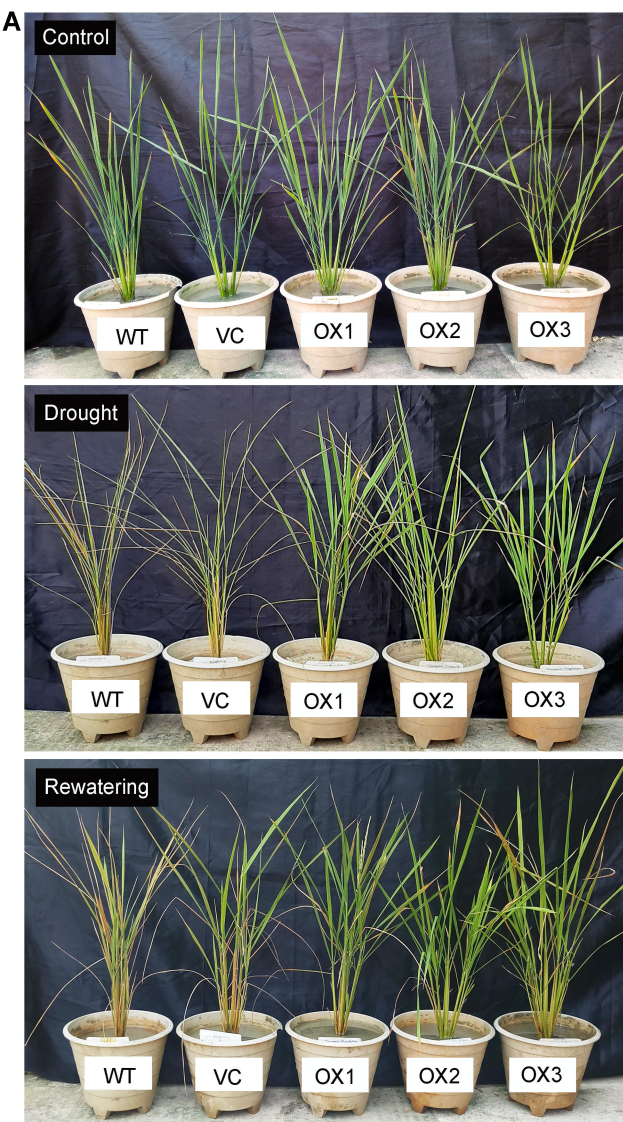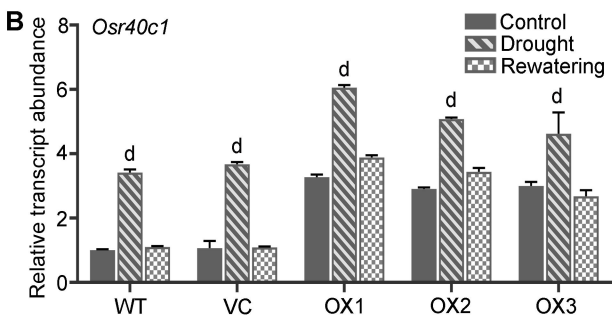

**A**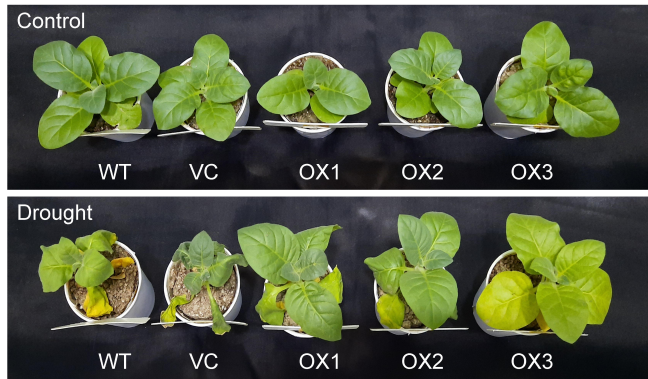**B**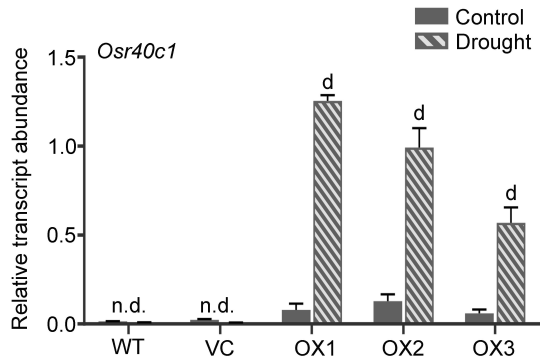

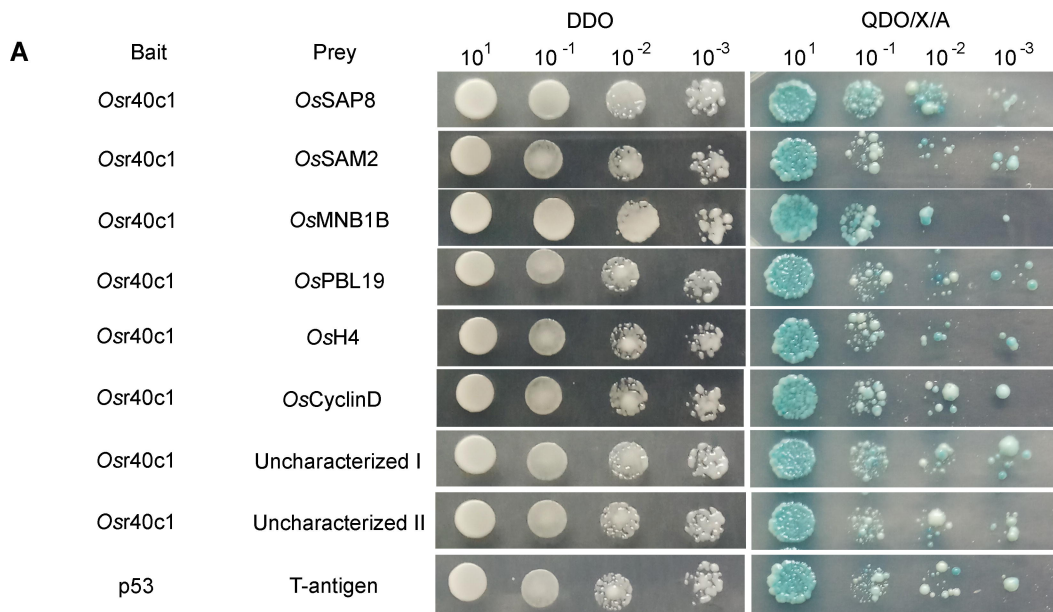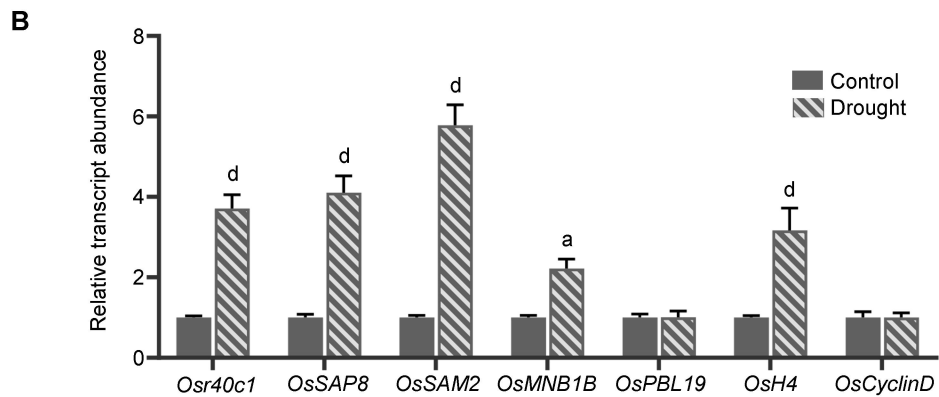

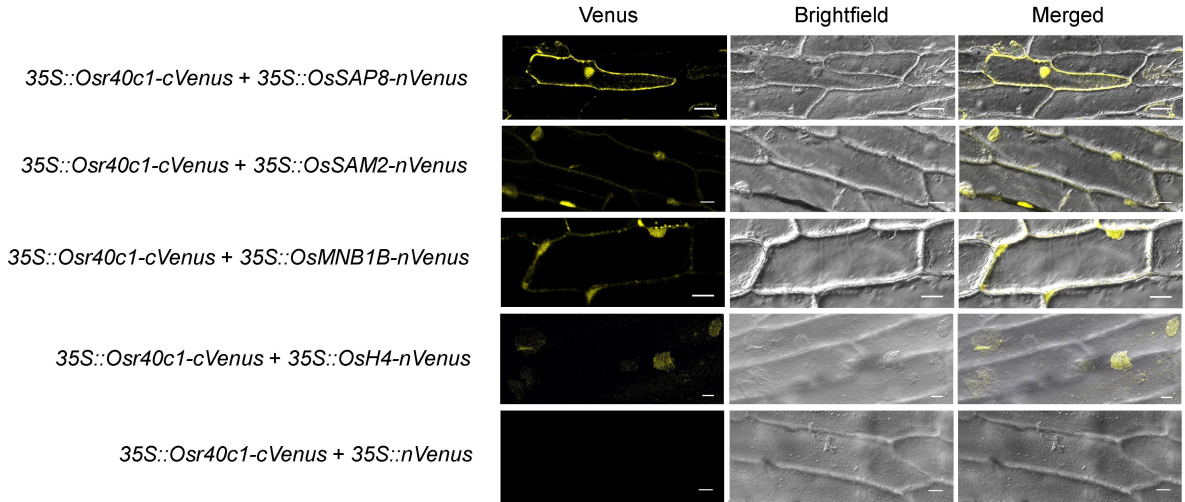

Scale 50 um

**A**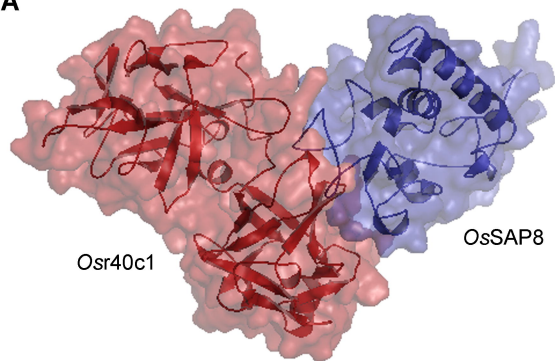**B**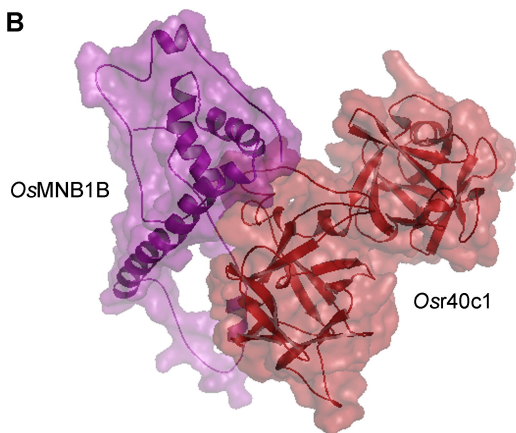**C**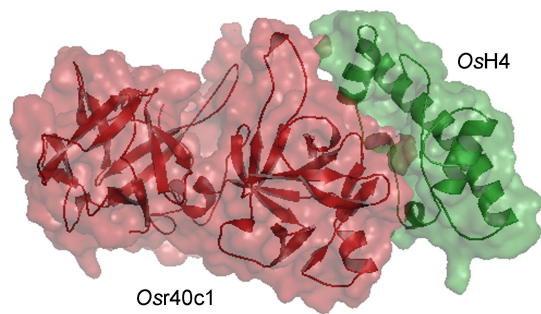**D**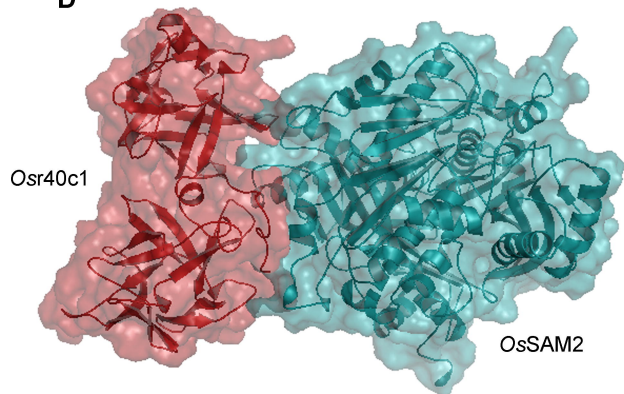



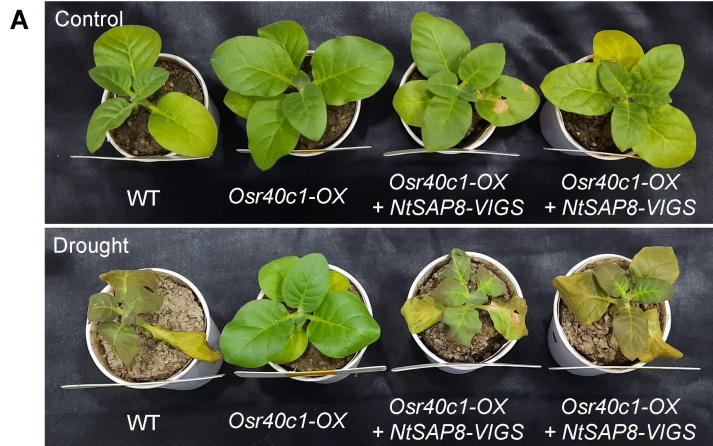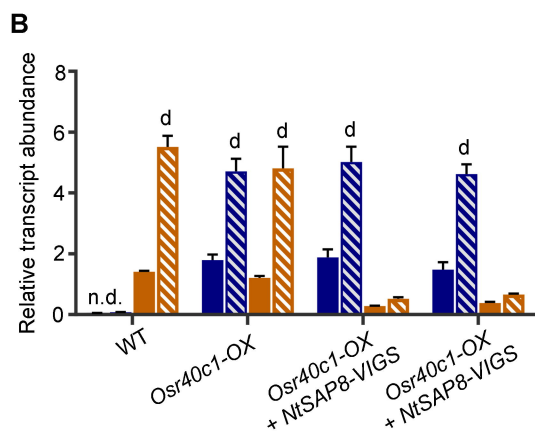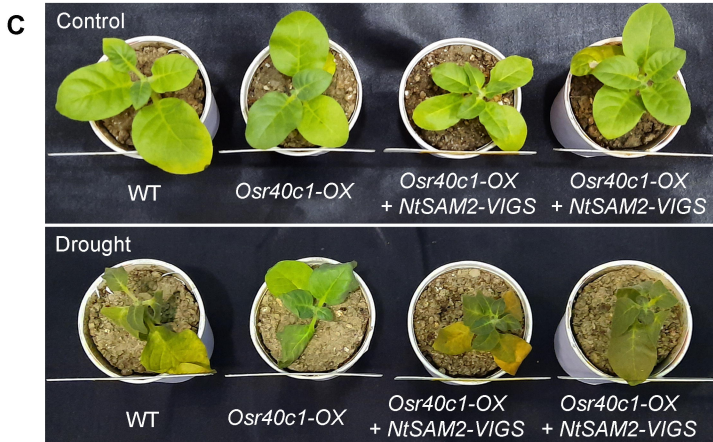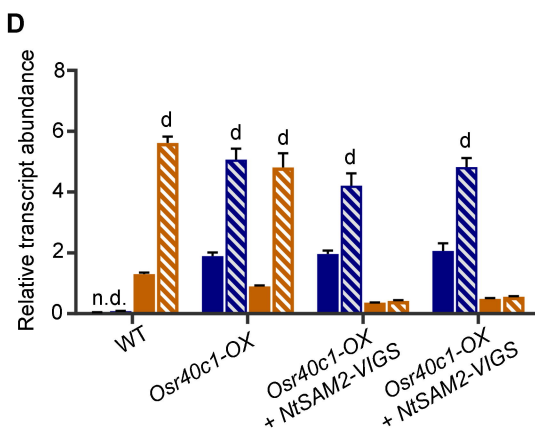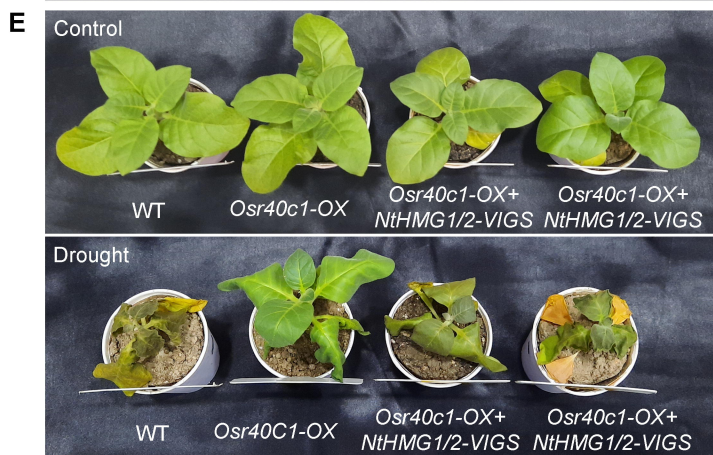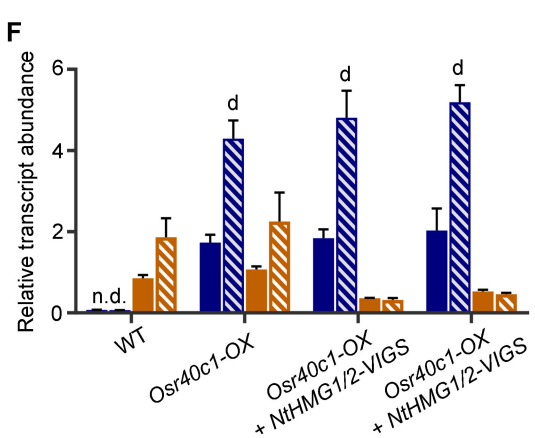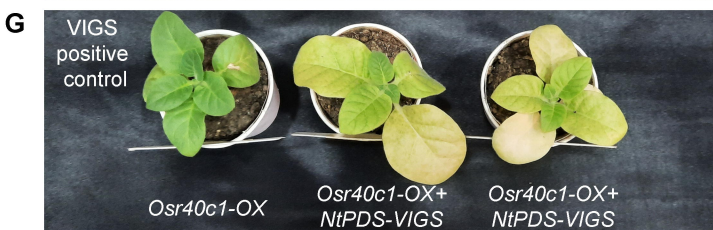

■ *Osr40c1* Control    ■ *NtSAP8* Control  
 ▨ *Osr40c1* Drought    ▨ *NtSAP8* Drought

**Drought stress**

**Osr40c1**

**OsSAM2**

**OsSAP8**

**OsH4**

**OsMNB1B**

**Polyamine biosynthesis**

Chromatin modification ?

**Transcriptional activation of drought responsive genes**

**Drought tolerance**
